# Supplementary material for: Even moderate geomagnetic pulsations can cause fluctuations of foF2 frequency of the auroral ionosphere
Source: Copernicus journal article supplement (doi:10.5194/angeo-2020-16), 2020-05-13
Supplement: Supplementary file 1 [file angeo-2020-16-supplement.zip]

**Table 1.** Intervals with foF2 obtained from Eq. (1) checked visually. Year 2014.

| Year | Month | Day | DOY | Start UT | Final UT | Comment            |
|------|-------|-----|-----|----------|----------|--------------------|
| 2014 | 2     | 24  | 55  | 9:00     | 14:59    | Upper              |
| 2014 | 4     | 11  | 101 | 8:00     | 15:59    |                    |
| 2014 | 5     | 24  | 144 | 7:00     | 15:00    |                    |
| 2014 | 6     | 8   | 159 | 7:00     | 15:59    | Upper              |
| 2014 | 6     | 21  | 172 | 9:00     | 15:59    |                    |
| 2014 | 8     | 18  | 230 | 8:00     | 15:59    |                    |
| 2014 | 9     | 13  | 256 | 8:00     | 15:59    |                    |
| 2014 | 9     | 14  | 257 | 8:00     | 15:59    |                    |
| 2014 | 9     | 15  | 258 | 8:00     | 15:59    |                    |
| 2014 | 9     | 16  | 259 | 8:00     | 15:59    |                    |
| 2014 | 9     | 25  | 268 | 8:00     | 15:59    |                    |
| 2014 | 10    | 15  | 288 | 8:00     | 15:10    |                    |
| 2014 | 10    | 19  | 292 | 8:00     | 14:30    |                    |
| 2014 | 10    | 24  | 297 | 8:00     | 12:40    |                    |
| 2014 | 10    | 31  | 304 | 8:00     | 14:59    |                    |
| 2014 | 11    | 6   | 310 | 8:00     | 14:59    |                    |
| 2014 | 11    | 7   | 311 | 8:00     | 14:59    |                    |
| 2014 | 11    | 8   | 312 | 8:00     | 13:30    |                    |
| 2014 | 11    | 10  | 314 | 9:00     | 12:30    |                    |
| 2014 | 11    | 11  | 315 | 9:00     | 14:40    |                    |
| 2014 | 11    | 12  | 316 | 9:00     | 14:59    |                    |
| 2014 | 12    | 7   | 341 | 9:00     | 12:20    |                    |
| 2014 | 12    | 10  | 344 | 9:00     | 14:59    |                    |
| 2014 | 12    | 13  | 347 | 9:00     | 14:00    |                    |
| 2014 | 12    | 27  | 361 | 9:00     | 14:20    |                    |
| 2014 | 12    | 29  | 363 | 9:00     | 12:30    |                    |
| 2015 | 1     | 3   | 3   | 9:00     | 13:20    |                    |
| 2015 | 1     | 22  | 22  | 9:00     | 12:10    |                    |
| 2015 | 1     | 30  | 30  | 9:00     | 12:20    |                    |
| 2015 | 2     | 15  | 46  | 9:30     | 13:10    |                    |
| 2015 | 3     | 8   | 67  | 9:00     | 13:40    |                    |
| 2015 | 3     | 10  | 69  | 9:00     | 15:59    |                    |
| 2015 | 3     | 11  | 70  | 10:50    | 15:00    |                    |
| 2015 | 4     | 4   | 94  | 9:00     | 14:20    | Broad max<br>Upper |
| 2015 | 5     | 14  | 134 | 9:00     | 14:20    |                    |
| 2015 | 5     | 15  | 135 | 9:10     | 15:59    |                    |
| 2015 | 5     | 19  | 139 | 8:40     | 14:50    |                    |
| 2015 | 5     | 20  | 140 | 8:00     | 11:20    |                    |
| 2015 | 5     | 20  | 140 | 12:10    | 15:59    |                    |
| 2015 | 6     | 12  | 163 | 7:20     | 15:59    | Upper              |
| 2015 | 6     | 30  | 181 | 7:00     | 8:40     |                    |
| 2015 | 6     | 30  | 181 | 9:10     | 12:20    |                    |
| 2015 | 6     | 30  | 181 | 13:30    | 15:59    | Upper              |
| 2015 | 7     | 11  | 192 | 12:20    | 15:59    |                    |
| 2015 | 7     | 12  | 193 | 7:20     | 15:30    |                    |
| 2015 | 7     | 15  | 196 | 8:20     | 10:30    | Upper              |
| 2015 | 7     | 15  | 196 | 11:10    | 15:59    |                    |
| 2015 | 7     | 21  | 202 | 8:00     | 11:10    |                    |
| 2015 | 7     | 21  | 202 | 12:50    | 15:59    |                    |
| 2015 | 9     | 8   | 251 | 8:00     | 12:20    |                    |
| 2015 | 9     | 8   | 251 | 12:50    | 15:20    |                    |
| 2015 | 9     | 16  | 259 | 8:00     | 15:59    |                    |
| 2015 | 9     | 22  | 265 | 18:00    | 15:59    |                    |
| 2015 | 9     | 23  | 266 | 8:00     | 15:59    |                    |
| 2015 | 12    | 25  | 359 | 9:00     | 10:50    |                    |
